# Supplementary material for: Age-dependent redox status in the brain stem of NO-deficient hypertensive rats
Source: PubMed Central journal article supplement (PMC5594586; doi:10.1186/s12929-017-0366-4), 2017-09-11
Supplement: 12929_2017_366_MOESM1_ESM.pdf [file 12929_2017_366_MOESM1_ESM.pdf]

# Data analysis for a group of measurements

This is analysis script for data that use Reference 2 (“GAPDH2”).

The analysis script does the following: 1. Load and re-organize the data. 2. Record calibration curves  $C \sim \log(Cycle)$  for all measurement, including reference. 3. Fit linear model  $Cycle \sim Gene : Group + Location$ , use the `getOutliers` function from the `extremevalues` R package to detect outliers. Remove outliers from the fit, refit and replace outliers with model predictions. Use gene calibration curves to re-map corrected cycles to concentrations. 4. Create  $LogRat = \log(C/C_{ref})$  as response variable. 5. Do some exploratory plotting 6. Fit a linear model  $LogRat \sim Gene * Group + Location$  to the data. 7. Detect outliers again using the `getOutliers` function and replace them with linear fit predictions. 5. Re-fit the model. 6. Calculate contrasts (7-NI - KONTROLA, L-NAME - KONTROLA, L-NAME - 7-NI) for each gene, and calculate their significance using 3 methods: a. Single-step Bonferoni adjustment using function `glht` from R-package `multcomp` b. Westfall-Young resampling-based free step-down method c. Benjamini-Yekutieli adjustment of p-values 7. Compare to see if p-values are consistent 8. Make plots of data and results

## Load data

Load and merge the csv’s containing gene expression data. The data are directly taken from Excel. Data marked as outliers are excluded.

| ##    | Location | Group    | Cycle | C         | Gene           |
|-------|----------|----------|-------|-----------|----------------|
| ## 1  | 4E       | KONTROLA | 24.61 | 25.15787  | GAPDH_FOR_ENOS |
| ## 2  | 4E       | KONTROLA | 24.38 | 31.02474  | GAPDH_FOR_ENOS |
| ## 3  | 8E       | KONTROLA | 27.72 | 1.44032   | GAPDH_FOR_ENOS |
| ## 4  | 8E       | KONTROLA | 27.28 | 2.15049   | GAPDH_FOR_ENOS |
| ## 5  | 4F       | KONTROLA | 25.18 | 14.91895  | GAPDH_FOR_ENOS |
| ## 6  | 4F       | KONTROLA | 25.04 | 16.90031  | GAPDH_FOR_ENOS |
| ## 7  | 8F       | KONTROLA | 36.46 | NA        | GAPDH_FOR_ENOS |
| ## 8  | 8F       | KONTROLA | 28.27 | 0.86456   | GAPDH_FOR_ENOS |
| ## 9  | 4G       | KONTROLA | 25.25 | 13.97613  | GAPDH_FOR_ENOS |
| ## 10 | 4G       | KONTROLA | 25.65 | 9.64860   | GAPDH_FOR_ENOS |
| ## 11 | 8G       | KONTROLA | 24.32 | 32.97945  | GAPDH_FOR_ENOS |
| ## 12 | 8G       | KONTROLA | 24.44 | 29.44046  | GAPDH_FOR_ENOS |
| ## 13 | 12E      | 7-NI     | 26.93 | 2.97573   | GAPDH_FOR_ENOS |
| ## 14 | 12E      | 7-NI     | 26.54 | 4.24731   | GAPDH_FOR_ENOS |
| ## 15 | 16E      | 7-NI     | 25.88 | 7.81642   | GAPDH_FOR_ENOS |
| ## 16 | 16E      | 7-NI     | 25.84 | 8.11699   | GAPDH_FOR_ENOS |
| ## 17 | 12F      | 7-NI     | 25.89 | 7.75030   | GAPDH_FOR_ENOS |
| ## 18 | 12F      | 7-NI     | 25.84 | 8.12077   | GAPDH_FOR_ENOS |
| ## 19 | 16F      | 7-NI     | 24.37 | 31.50016  | GAPDH_FOR_ENOS |
| ## 20 | 16F      | 7-NI     | 24.35 | 31.90786  | GAPDH_FOR_ENOS |
| ## 21 | 12G      | 7-NI     | 23.16 | 95.96038  | GAPDH_FOR_ENOS |
| ## 22 | 12G      | 7-NI     | 23.72 | 56.96787  | GAPDH_FOR_ENOS |
| ## 23 | 16G      | 7-NI     | 23.59 | 64.55822  | GAPDH_FOR_ENOS |
| ## 24 | 16G      | 7-NI     | 23.68 | 59.14144  | GAPDH_FOR_ENOS |
| ## 25 | 20E      | L-NAME   | 24.03 | NA        | GAPDH_FOR_ENOS |
| ## 26 | 20E      | L-NAME   | 24.50 | 27.87211  | GAPDH_FOR_ENOS |
| ## 27 | 20F      | L-NAME   | 24.11 | 40.00418  | GAPDH_FOR_ENOS |
| ## 28 | 20F      | L-NAME   | 24.23 | 35.82644  | GAPDH_FOR_ENOS |
| ## 29 | 24F      | L-NAME   | 24.52 | 27.25456  | GAPDH_FOR_ENOS |
| ## 30 | 24F      | L-NAME   | 24.87 | 19.72896  | GAPDH_FOR_ENOS |
| ## 31 | 20G      | L-NAME   | 22.48 | 179.65227 | GAPDH_FOR_ENOS |
| ## 32 | 20G      | L-NAME   | 22.40 | 192.42992 | GAPDH_FOR_ENOS |

```
## 33      24G  L-NAME 24.51  27.62451 GAPDH_FOR_ENOS
## 34      24G  L-NAME 24.68  23.68868 GAPDH_FOR_ENOS

## Loading required package: ggplot2
## Warning: Removed 2 rows containing missing values (geom_point).
```

Reference: Cycle by Group and Location

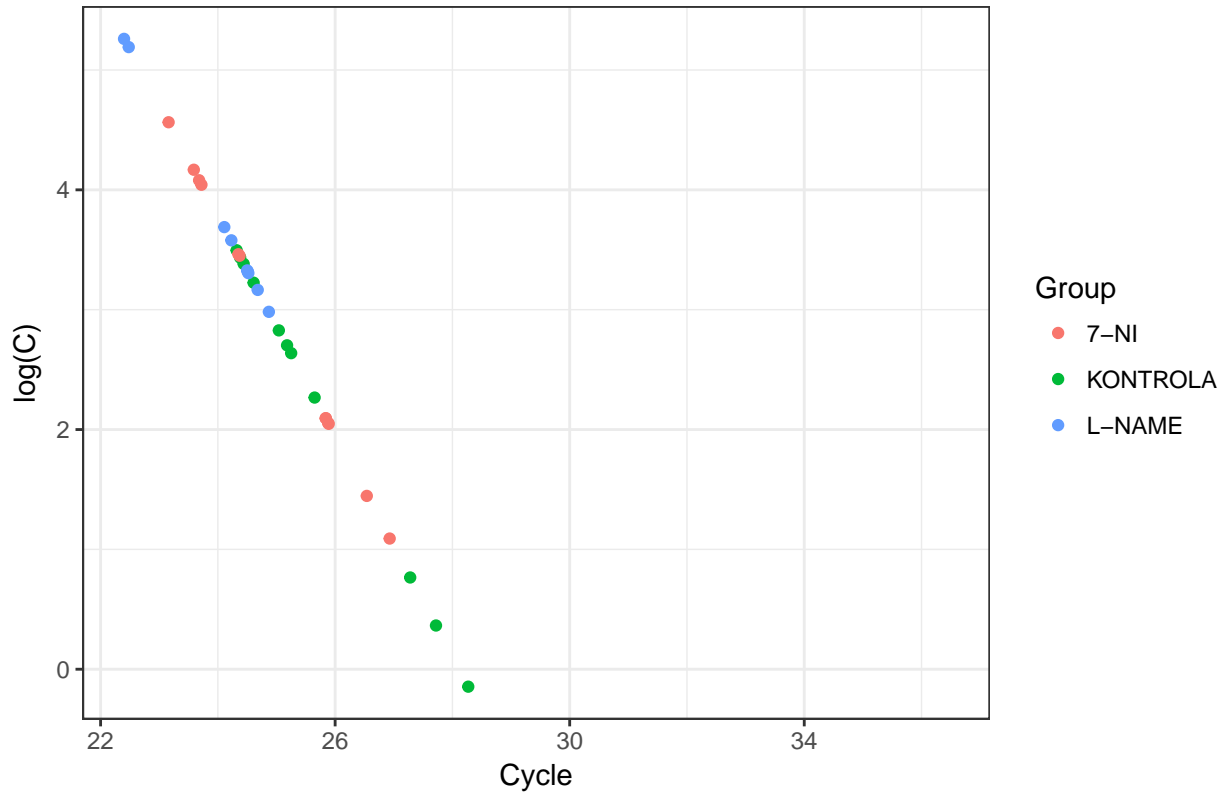

```
##
## Call:
## lm(formula = log(C) ~ Cycle, data = reference)
##
## Residuals:
##      Min       1Q   Median       3Q      Max
## -0.0045254 -0.0019477  0.0003691  0.0020911  0.0033850
##
## Coefficients:
##              Estimate Std. Error t value Pr(>|t|)
## (Intercept) 25.8930980  0.0076638   3379 <2e-16 ***
## Cycle       -0.9210489  0.0003068  -3002 <2e-16 ***
## ---
## Signif. codes:  0 '***' 0.001 '**' 0.01 '*' 0.05 '.' 0.1 ' ' 1
##
## Residual standard error: 0.002357 on 30 degrees of freedom
## (2 observations deleted due to missingness)
## Multiple R-squared:  1, Adjusted R-squared:  1
## F-statistic: 9.014e+06 on 1 and 30 DF, p-value: < 2.2e-16
## Warning: Removed 2 rows containing missing values (geom_point).
```

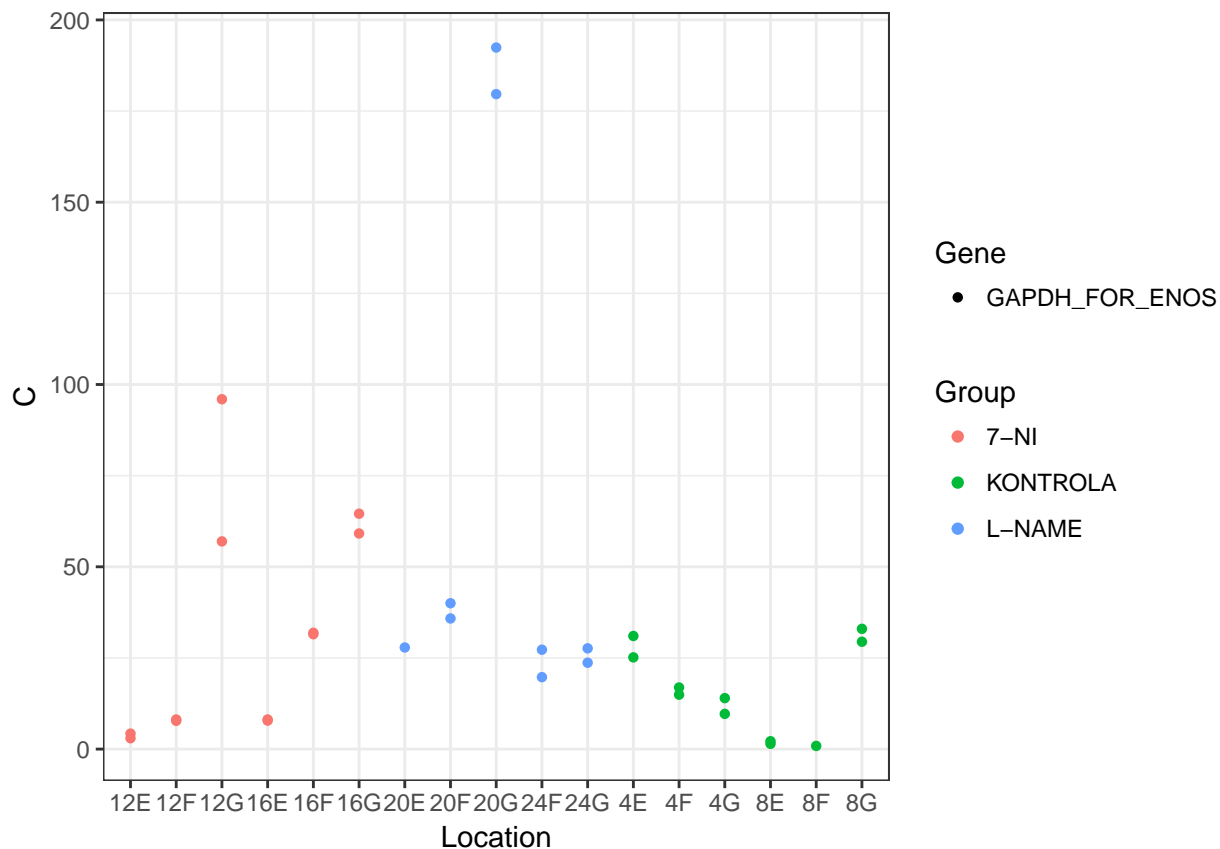

| ##    | Location | Group    | Cycle | C        | Gene | Cref     | LogRat      |
|-------|----------|----------|-------|----------|------|----------|-------------|
| ## 1  | 4E       | KONTROLA | 25.13 | 23.40655 | eNOS | 25.15787 | -0.07215487 |
| ## 2  | 4E       | KONTROLA | 25.31 | 20.62494 | eNOS | 31.02474 | -0.40828393 |
| ## 3  | 8E       | KONTROLA | 27.87 | 3.53099  | eNOS | 1.44032  | 0.89671297  |
| ## 4  | 8E       | KONTROLA | 27.93 | 3.38676  | eNOS | 2.15049  | 0.45417799  |
| ## 5  | 4F       | KONTROLA | 26.07 | 12.21931 | eNOS | 14.91895 | -0.19961473 |
| ## 6  | 4F       | KONTROLA | 26.18 | 11.35273 | eNOS | 16.90031 | -0.39787372 |
| ## 7  | 8F       | KONTROLA | 30.21 | 0.70028  | eNOS | NA       | NA          |
| ## 8  | 8F       | KONTROLA | 29.92 | 0.85420  | eNOS | 0.86456  | -0.01205535 |
| ## 9  | 4G       | KONTROLA | 26.85 | 7.13067  | eNOS | 13.97613 | -0.67294568 |
| ## 10 | 4G       | KONTROLA | 27.18 | 5.68889  | eNOS | 9.64860  | -0.52829768 |
| ## 11 | 8G       | KONTROLA | 25.66 | 16.20418 | eNOS | 32.97945 | -0.71061541 |
| ## 12 | 8G       | KONTROLA | 25.69 | 15.89199 | eNOS | 29.44046 | -0.61655471 |
| ## 13 | 12E      | 7-NI     | 28.24 | 2.73060  | eNOS | 2.97573  | -0.08596802 |
| ## 14 | 12E      | 7-NI     | 28.23 | 2.74681  | eNOS | 4.24731  | -0.43584560 |
| ## 15 | 16E      | 7-NI     | 27.44 | 4.76634  | eNOS | 7.81642  | -0.49464793 |
| ## 16 | 16E      | 7-NI     | 27.44 | 4.74354  | eNOS | 8.11699  | -0.53717570 |
| ## 17 | 12F      | 7-NI     | 27.23 | 5.50878  | eNOS | 7.75030  | -0.34138837 |
| ## 18 | 12F      | 7-NI     | 27.20 | 5.60288  | eNOS | 8.12077  | -0.37114423 |
| ## 19 | 16F      | 7-NI     | 25.89 | 13.81611 | eNOS | 31.50016 | -0.82415732 |
| ## 20 | 16F      | 7-NI     | 26.07 | 12.26612 | eNOS | 31.90786 | -0.95601138 |
| ## 21 | 12G      | 7-NI     | 26.04 | 12.50009 | eNOS | 95.96038 | -2.03819955 |
| ## 22 | 12G      | 7-NI     | 27.26 | NA       | eNOS | 56.96787 | NA          |
| ## 23 | 16G      | 7-NI     | 25.81 | 14.61225 | eNOS | 64.55822 | -1.48570723 |
| ## 24 | 16G      | 7-NI     | 25.92 | 13.55469 | eNOS | 59.14144 | -1.47319925 |
| ## 25 | 20E      | L-NAME   | 26.08 | 12.15571 | eNOS | NA       | NA          |

```

## 26      20E  L-NAME 28.38      NA eNOS 27.87211      NA
## 27      20F  L-NAME 25.61 16.81545 eNOS 40.00418 -0.86668584
## 28      20F  L-NAME 26.02 12.64337 eNOS 35.82644 -1.04155320
## 29      24F  L-NAME 26.30 10.45606 eNOS 27.25456 -0.95803913
## 30      24F  L-NAME 26.55  8.75525 eNOS 19.72896 -0.81243409
## 31      20G  L-NAME 23.15 92.21840 eNOS 179.65227 -0.66686347
## 32      20G  L-NAME 23.82 57.91399 eNOS 192.42992 -1.20077306
## 33      24G  L-NAME 26.72  7.82111 eNOS 27.62451 -1.26187693
## 34      24G  L-NAME 27.24  5.47251 eNOS 23.68868 -1.46525992

## [1] "Number of data rows: 34"

##      Location      Group Cycle      C Gene      Cref      LogRat
## 1      4E KONTROLA 25.13 23.40655 eNOS 25.15787 -0.07215487
## 3      8E KONTROLA 27.87  3.53099 eNOS  1.44032  0.89671297
## 4      8E KONTROLA 27.93  3.38676 eNOS  2.15049  0.45417799
## 5      4F KONTROLA 26.07 12.21931 eNOS 14.91895 -0.19961473
## 6      4F KONTROLA 26.18 11.35273 eNOS 16.90031 -0.39787372
## 8      8F KONTROLA 29.92  0.85420 eNOS  0.86456 -0.01205535
## 9      4G KONTROLA 26.85  7.13067 eNOS 13.97613 -0.67294568
## 10     4G KONTROLA 27.18  5.68889 eNOS  9.64860 -0.52829768
## 12     8G KONTROLA 25.69 15.89199 eNOS 29.44046 -0.61655471
## 13     12E      7-NI 28.24  2.73060 eNOS  2.97573 -0.08596802
## 14     12E      7-NI 28.23  2.74681 eNOS  4.24731 -0.43584560
## 15     16E      7-NI 27.44  4.76634 eNOS  7.81642 -0.49464793
## 16     16E      7-NI 27.44  4.74354 eNOS  8.11699 -0.53717570
## 17     12F      7-NI 27.23  5.50878 eNOS  7.75030 -0.34138837
## 18     12F      7-NI 27.20  5.60288 eNOS  8.12077 -0.37114423
## 29     24F  L-NAME 26.30 10.45606 eNOS 27.25456 -0.95803913
## 30     24F  L-NAME 26.55  8.75525 eNOS 19.72896 -0.81243409
## 33     24G  L-NAME 26.72  7.82111 eNOS 27.62451 -1.26187693
## 34     24G  L-NAME 27.24  5.47251 eNOS 23.68868 -1.46525992

## [1] "Before:"
## [1] "7-NI"      "KONTROLA" "L-NAME"
## [1] "After:"
## [1] "KONTROLA" "7-NI"      "L-NAME"
## [1] "Before:"
## [1] "12E" "12F" "16E" "24F" "24G" "4E"  "4F"  "4G"  "8E"  "8F"  "8G"
## [1] "After:"
## [1] "12E" "12F" "16E" "24F" "24G" "4E"  "4F"  "4G"  "8E"  "8F"  "8G"

```

Cycle by Gene, Group and Location

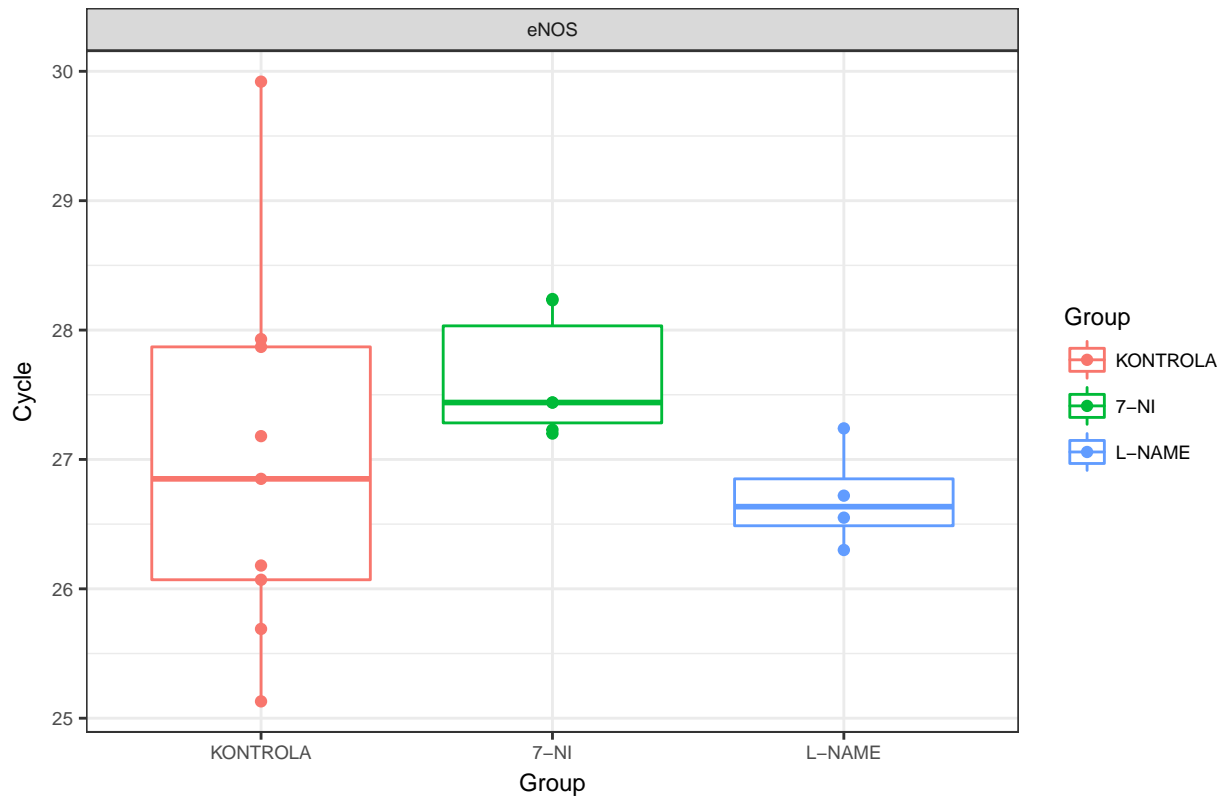

C eNOs vs. GAPDH by Group

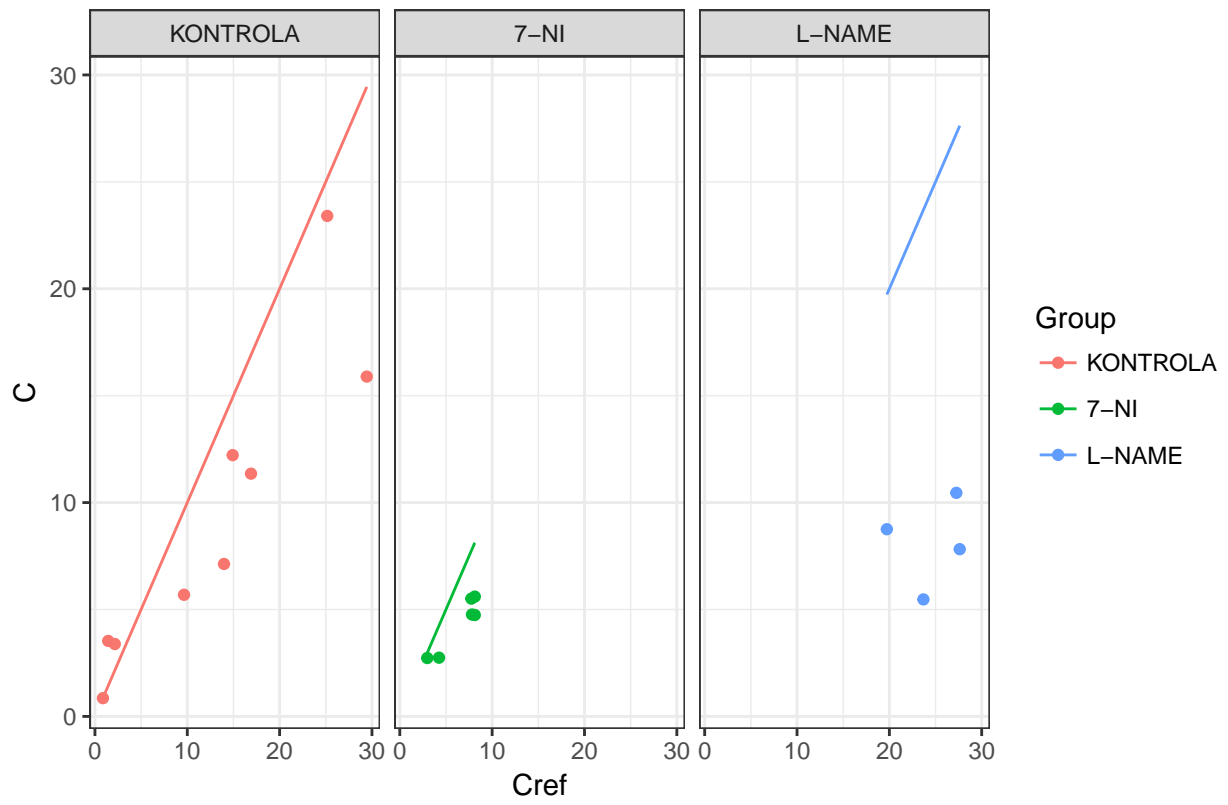

LogRat eNOs vs. GAPDH by Group

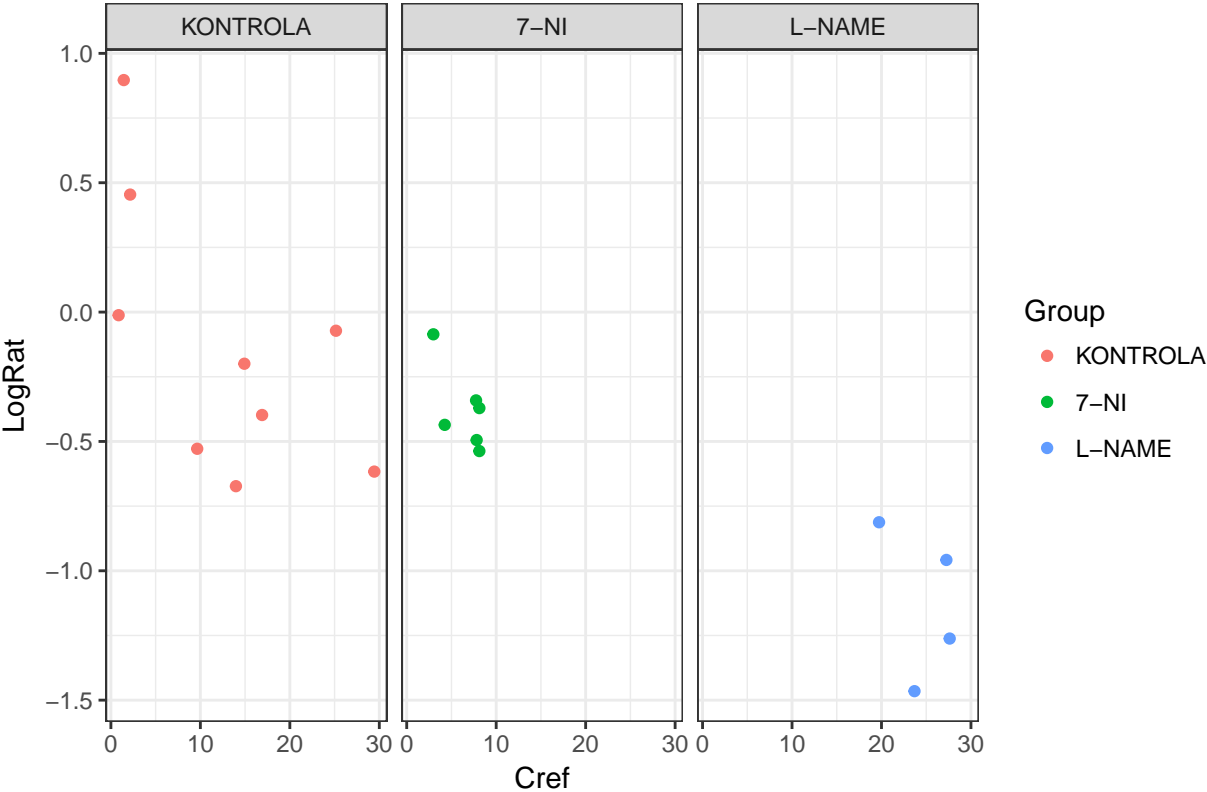

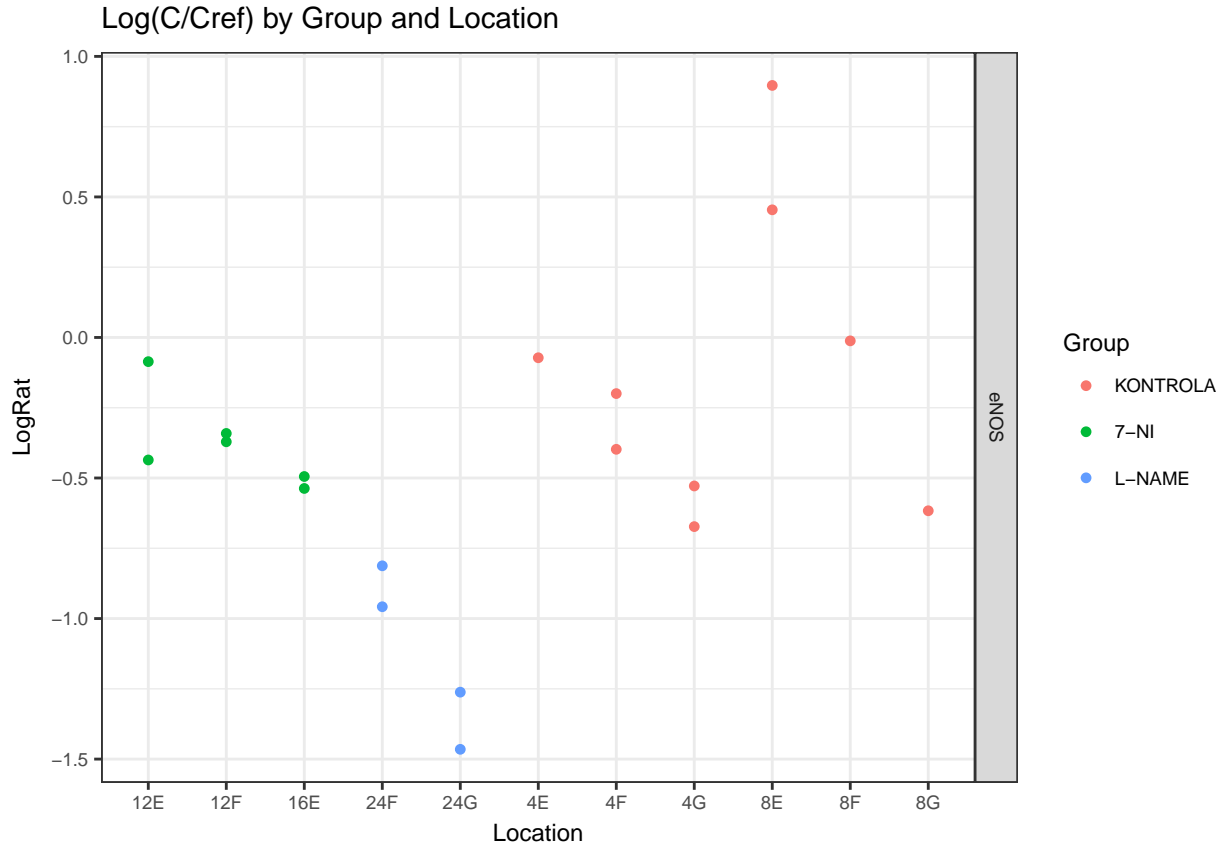

Fit linear model to data and detect outliers.

The model says: Express each  $\log(C/C_{ref})$  value as  $\mu_0 + \mu_{Group}$

```
##
## Call:
## lm(formula = LogRat ~ Group, data = measurement)
##
## Residuals:
##      Min       1Q   Median       3Q      Max
## -0.54532 -0.21487 -0.05815  0.14097  1.02434
##
## Coefficients:
##              Estimate Std. Error t value Pr(>|t|)
## (Intercept)  -0.1276     0.1336  -0.956  0.353490
## Group7-NI    -0.2501     0.2112  -1.184  0.253609
## GroupL-NAME  -0.9968     0.2408  -4.140  0.000769 ***
## ---
## Signif. codes:  0 '***' 0.001 '**' 0.01 '*' 0.05 '.' 0.1 ' ' 1
##
## Residual standard error: 0.4007 on 16 degrees of freedom
## Multiple R-squared:  0.5184, Adjusted R-squared:  0.4582
## F-statistic: 8.611 on 2 and 16 DF, p-value: 0.002894
```





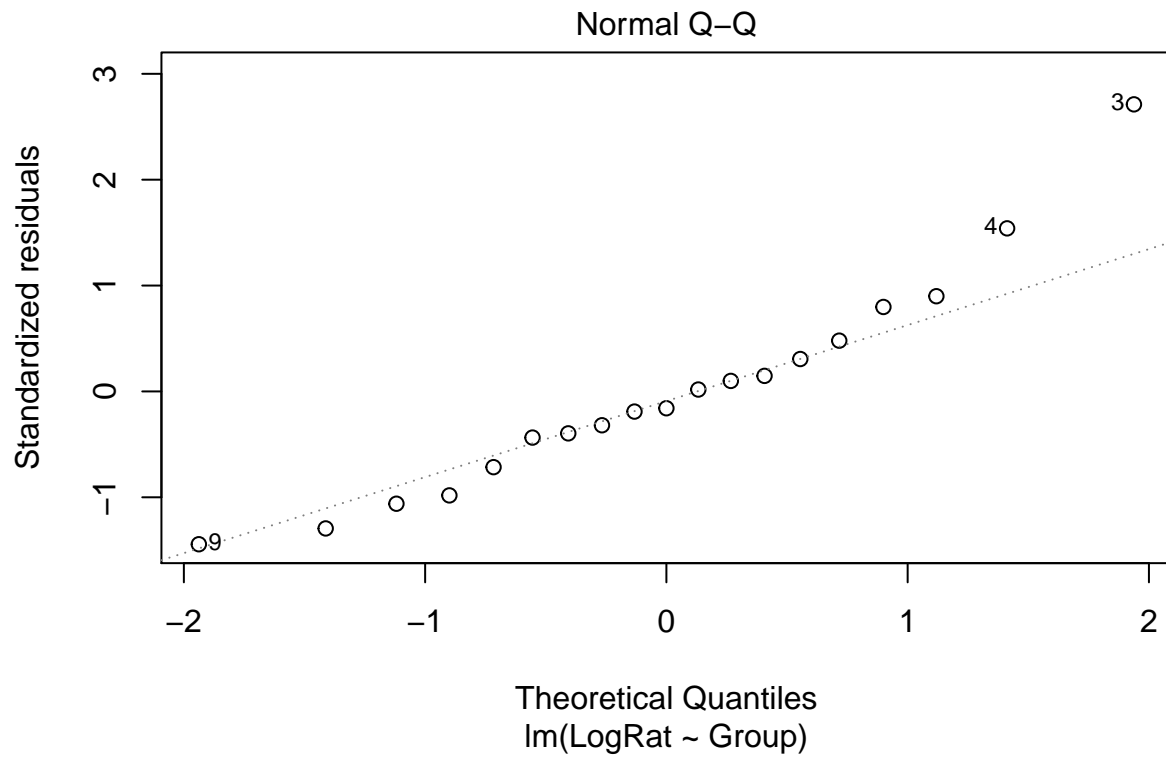

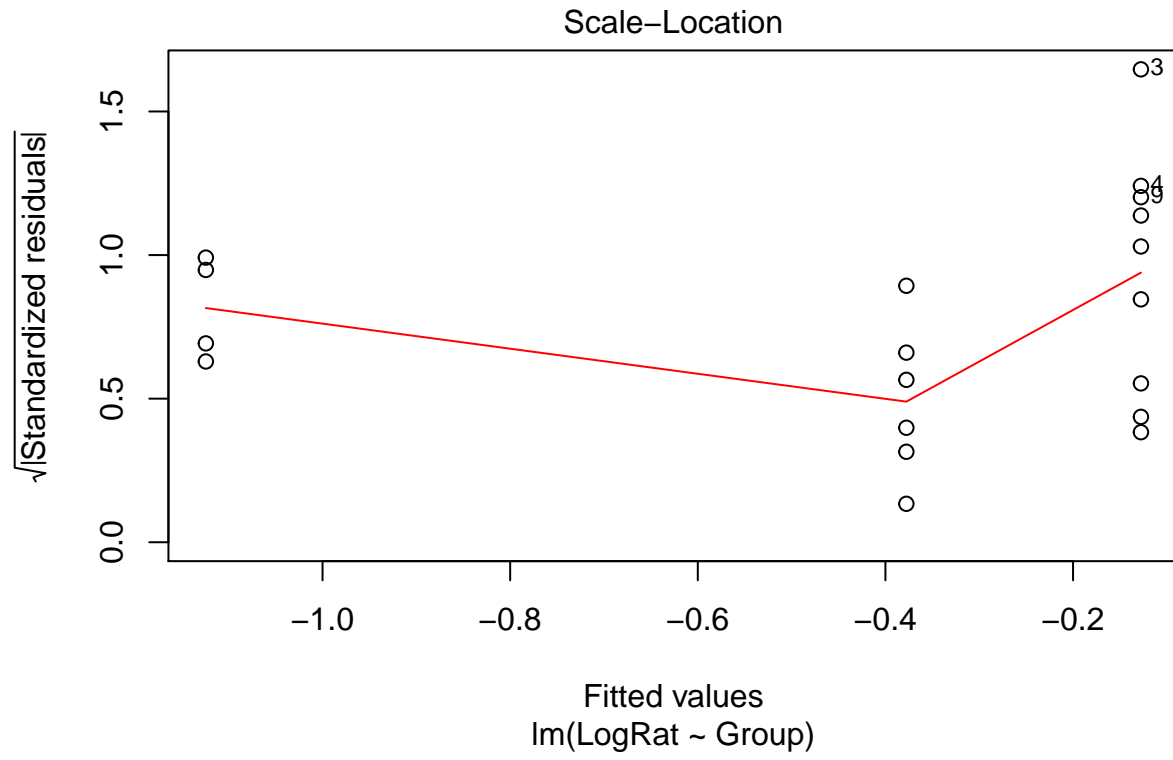

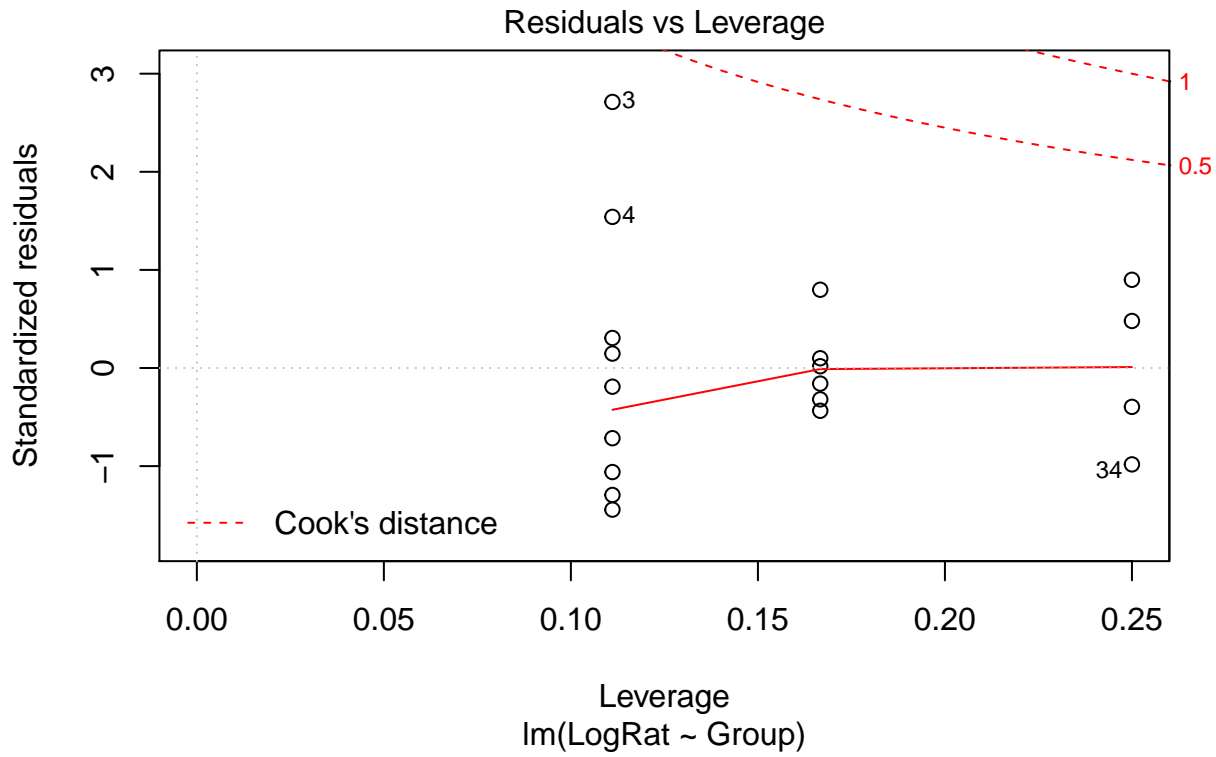

We see there are outlying data, and the distribution of residuals is not exactly Gaussian.

We will detect the outliers using a very impartial tool, then replace them with linear model predictions

```
## Loading required package: extremevalues
```

```
## [1] "Outliers detected:"
```

```
##   Location   Group Cycle      C Gene   Cref  LogRat
## 3      8E KONTROLA 27.87 3.53099 eNOS 1.44032 0.896713
## 4      8E KONTROLA 27.93 3.38676 eNOS 2.15049 0.454178
```

```
## [1] Location Group   Cycle   C      Gene   Cref   LogRat
```

```
## <0 rows> (or 0-length row.names)
```

```
## [1] "Replaced with expectations: Outliers"
```

```
##   Location   Group Cycle      C Gene   Cref LogRat Outlier LogRat.Orig
## 3      8E KONTROLA 27.87 3.53099 eNOS 1.44032    NA    TRUE    0.896713
## 4      8E KONTROLA 27.93 3.38676 eNOS 2.15049    NA    TRUE    0.454178
```

```
## Warning: Removed 2 rows containing missing values (geom_point).
```

log(C/Cref) by Gene, Group and Location: Hollow: original, solid: corrected

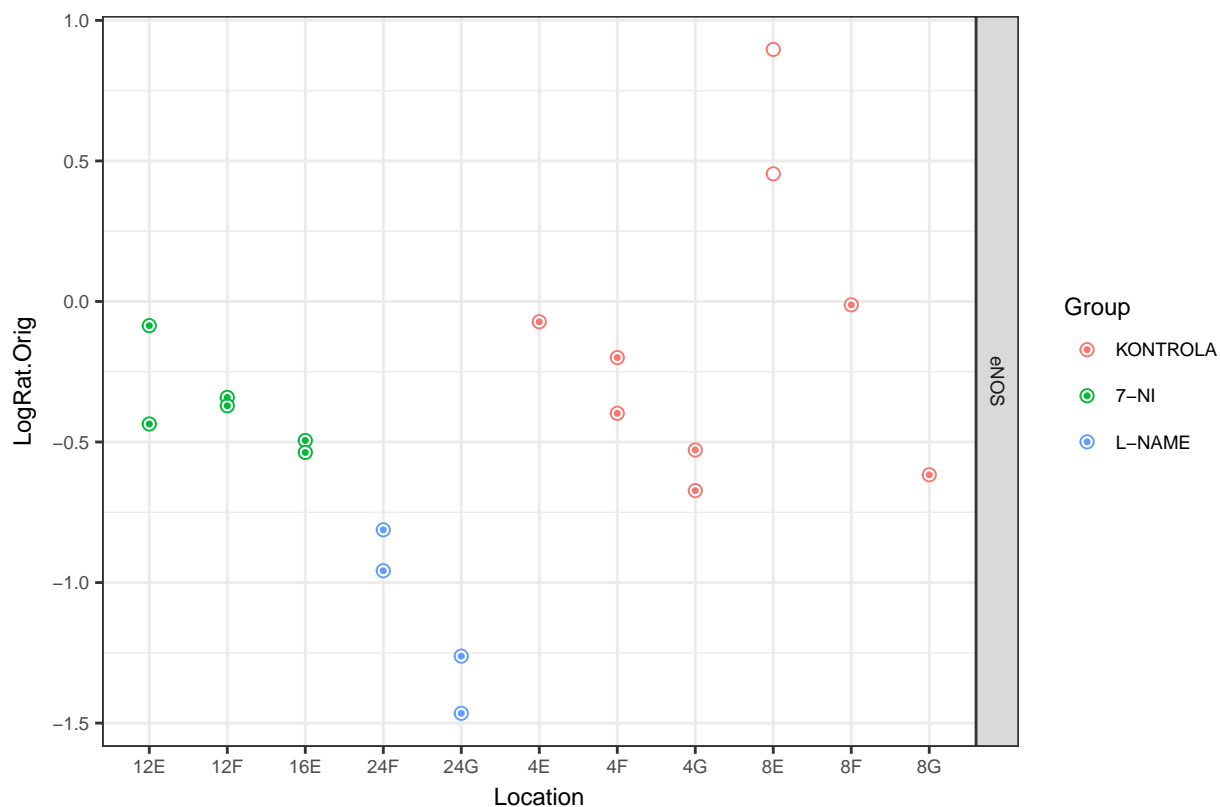

We detected 13 values (out of 306) and replaced them with linear fit predictions.

**Fit linear model to data:  $\log(C/C_{ref}) \sim \text{Gene} : \text{Group} + \text{Location}$**

```
##
## Call:
## lm(formula = LogRat ~ Group, data = measurement)
##
## Residuals:
##      Min       1Q   Median       3Q      Max
## -0.3409 -0.1595 -0.0408  0.1664  0.3450
##
## Coefficients:
##              Estimate Std. Error t value Pr(>|t|)
## (Intercept) -0.35707    0.09103  -3.922 0.001533 **
## Group7-NI   -0.02062    0.13400  -0.154 0.879875
## GroupL-NAME -0.76733    0.15096  -5.083 0.000167 ***
## ---
## Signif. codes:  0 '***' 0.001 '**' 0.01 '*' 0.05 '.' 0.1 ' ' 1
##
## Residual standard error: 0.2409 on 14 degrees of freedom
## (2 observations deleted due to missingness)
## Multiple R-squared:  0.684, Adjusted R-squared:  0.6389
## F-statistic: 15.15 on 2 and 14 DF,  p-value: 0.0003146
```

We see that the model diagnostics are improved, but the residuals are still slightly non-gaussian.

## ANOVA for the linear model

```
## Analysis of Variance Table
##
## Response: LogRat
##           Df Sum Sq Mean Sq F value    Pr(>F)
## Group      2  1.75800  0.87900   15.152 0.0003146 ***
## Residuals 14  0.81214  0.05801
## ---
## Signif. codes:  0 '***' 0.001 '**' 0.01 '*' 0.05 '.' 0.1 ' ' 1
```

Express data as combinations of fit coefficients. Express group means as combinations of fit coefficients.

```
##           Group (Intercept) Group7-NI GroupL-NAME
## 1 KONTROLA                1           0           0
## 3 KONTROLA                1           0           0
## 4 KONTROLA                1           0           0
## 5 KONTROLA                1           0           0
## 6 KONTROLA                1           0           0
## 8 KONTROLA                1           0           0
## 9 KONTROLA                1           0           0
## 10 KONTROLA               1           0           0
## 12 KONTROLA               1           0           0
## 13      7-NI               1           1           0
## 14      7-NI               1           1           0
## 15      7-NI               1           1           0
## 16      7-NI               1           1           0
## 17      7-NI               1           1           0
## 18      7-NI               1           1           0
## 29 L-NAME                  1           0           1
## 30 L-NAME                  1           0           1
## 33 L-NAME                  1           0           1
## 34 L-NAME                  1           0           1

##           Group (Intercept) Group7-NI GroupL-NAME
## 1 KONTROLA                1           0           0
## 2      7-NI                1           1           0
## 3 L-NAME                   1           0           1
```

## Plot fitted data

```
## Warning: Removed 2 rows containing missing values (geom_point).
```

```
## Warning: Removed 2 rows containing missing values (geom_point).
```

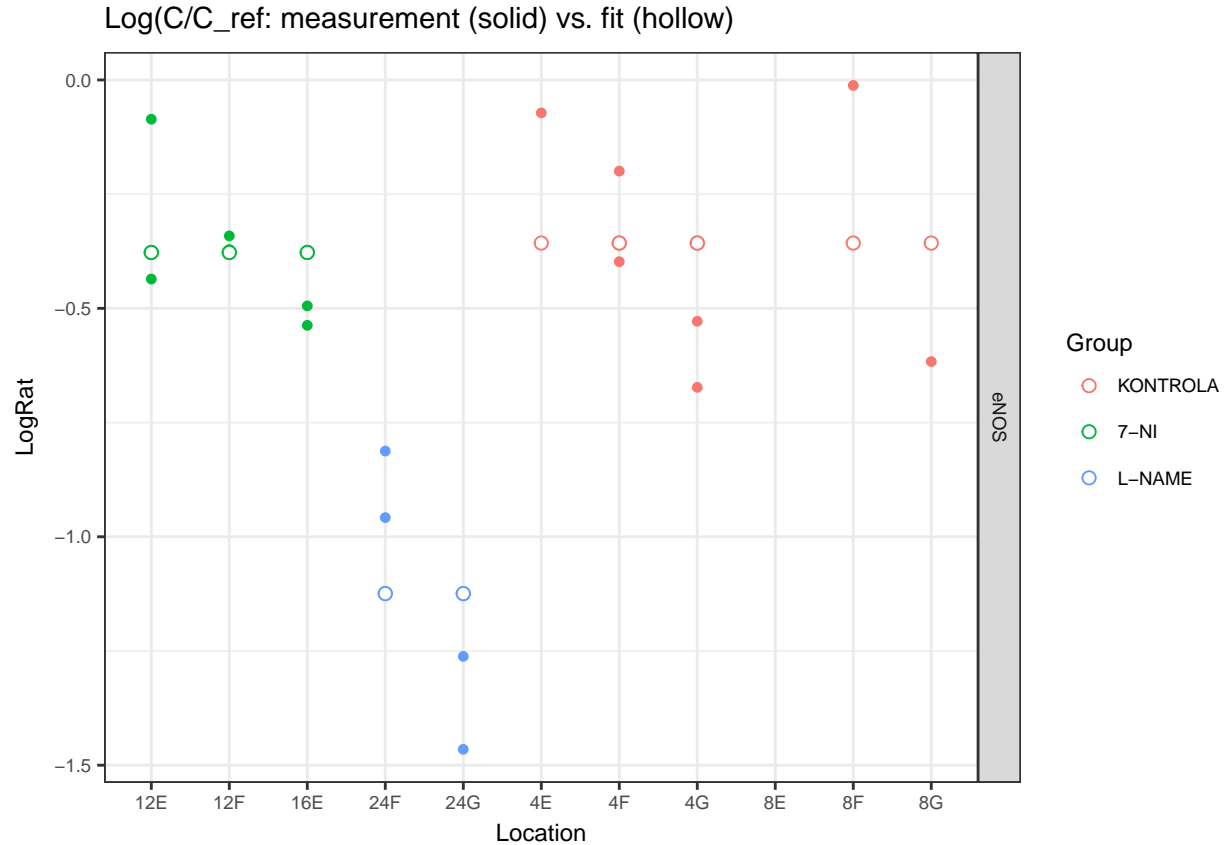

## Multiple comparisons

Define the contrasts to test in terms of linear model coefficients.

```
##                               (Intercept) Group7-NI GroupL-NAME
## eNOS: 7-NI - KONTROLA          0           1           0
## eNOS: L-NAME - KONTROLA        0           0           1
## eNOS: L-NAME - 7-NI            0          -1           1

## Loading required package: multcomp
## Loading required package: mvtnorm
## Loading required package: survival
## Loading required package: TH.data
## Loading required package: MASS

##
## Attaching package: 'TH.data'

## The following object is masked from 'package:MASS':
##
##   geyser

##
## Simultaneous Tests for General Linear Hypotheses
##
```

```
## Fit: lm(formula = LogRat ~ Group, data = measurement)
##
## Linear Hypotheses:
##
##              Estimate Std. Error t value Pr(>|t|)
## eNOS: 7-NI - KONTROLA == 0 -0.02062  0.13400  -0.154  0.987
## eNOS: L-NAME - KONTROLA == 0 -0.76733  0.15096  -5.083 <0.001 ***
## eNOS: L-NAME - 7-NI == 0    -0.74671  0.15547  -4.803 <0.001 ***
## ---
## Signif. codes:  0 '***' 0.001 '**' 0.01 '*' 0.05 '.' 0.1 ' ' 1
## (Adjusted p values reported -- single-step method)
```

The above are Bonferoni single-step adjusted p-values, that is, a very conservative estimate of significance.

## Use Westfall-Young resampling to get more reasonable p-values

This is a much better method in that it is not dependent on Gaussianity and takes into account correlations between tests. It provides family-wise p-values, similar to the previous method.

```
##              Contrast      t.stat p.adj
## 1  eNOS: 7-NI - KONTROLA -0.1539127 0.426
## 2 eNOS: L-NAME - KONTROLA -5.0829293 0.001
## 3   eNOS: L-NAME - 7-NI -4.8029105 0.001
```

We assemble the p-values from the previous methods to compare them.

## Benjamini-Yekutieli FDR-adjusted p-values

This is a different method than the previous two in that it controls false discovery rate (FDR) rather than family-wise error. This is a method routinely used in very large molecular biology studies, where thousands of tests are performed simultaneously.

The B-Y method does not depend on correlations between tests and does not make any Gaussianity assumptions.

```
##              Method      Contrast      p.adj
## 1 Westfall-Young eNOS: 7-NI - KONTROLA 0.4260000000
## 2 Westfall-Young eNOS: L-NAME - KONTROLA 0.0010000000
## 3 Westfall-Young   eNOS: L-NAME - 7-NI 0.0010000000
## 4   Bonferoni eNOS: 7-NI - KONTROLA 0.9869884801
## 5   Bonferoni eNOS: L-NAME - KONTROLA 0.0004575464
## 6   Bonferoni   eNOS: L-NAME - 7-NI 0.0007769206
```



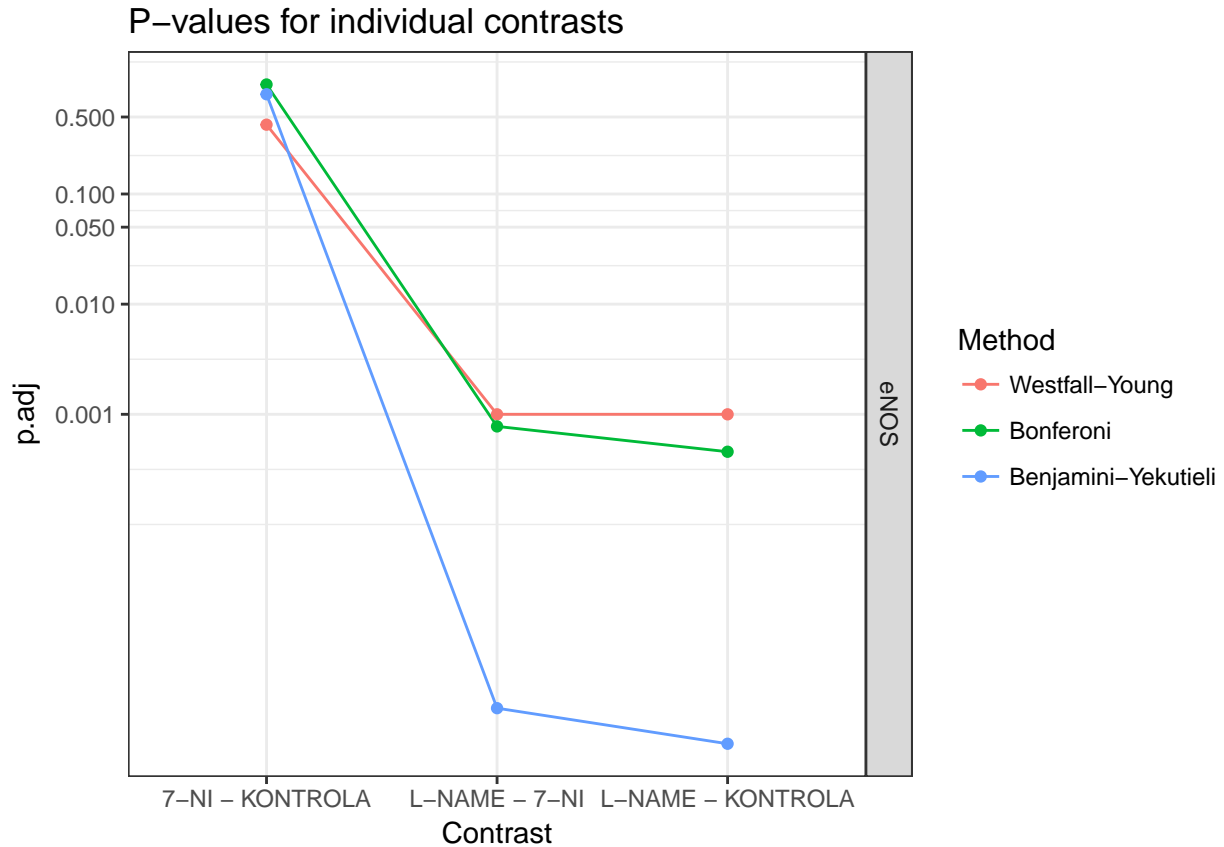

The minimum p-value the WY method can provide is limited by  $1/(\text{number of resamples})$ , which is 0.0001 in our case. Therefore, WY does not follow the BY and Bonferoni values at low p's, while elsewhere the three p-values behave in a very similar manner, the Bonferoni p-values, as the most conservative, being the highest. Apparently, B-Y can be used as a cheaper alternative to Westfall-Young, though the saving in simplicity is more important than that in computing time.

### Plot contrasts

We plot the differences between groups that were tested above.

```
##          Gene          Contrast  diff_log  sigma
## eNOS: 7-NI - KONTROLA  eNOS  7-NI - KONTROLA -0.02062401  0.1339981
## eNOS: L-NAME - KONTROLA  eNOS  L-NAME - KONTROLA -0.76733156  0.1509625
## eNOS: L-NAME - 7-NI      eNOS      L-NAME - 7-NI -0.74670754  0.1554698
##                               LegUp    LegDown
## eNOS: 7-NI - KONTROLA      0.1133741 -0.1546221
## eNOS: L-NAME - KONTROLA -0.6163691 -0.9182940
## eNOS: L-NAME - 7-NI      -0.5912377 -0.9021773
```

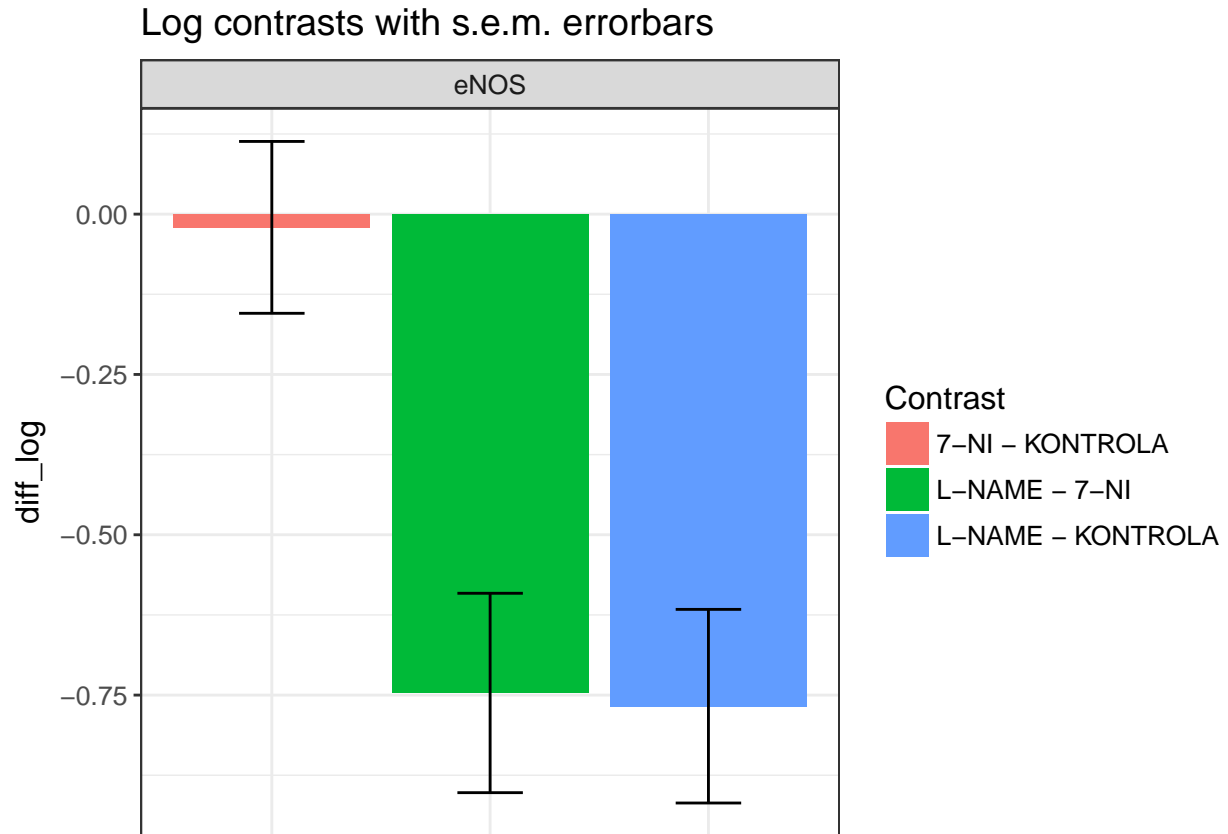

Finally, we plot gene/group means, which we should have done high above.

```
##      Group  LogRat   sigma   Ratio  LegDown  LegUp
## 1 KONTROLA -0.357071 0.09103379 0.6997228 0.6388378 0.7664106
## 2      7-NI -0.377695 0.09832774 0.6854395 0.6212494 0.7562621
## 3  L-NAME -1.124403 0.12042639 0.3248465 0.2879902 0.3664196
```

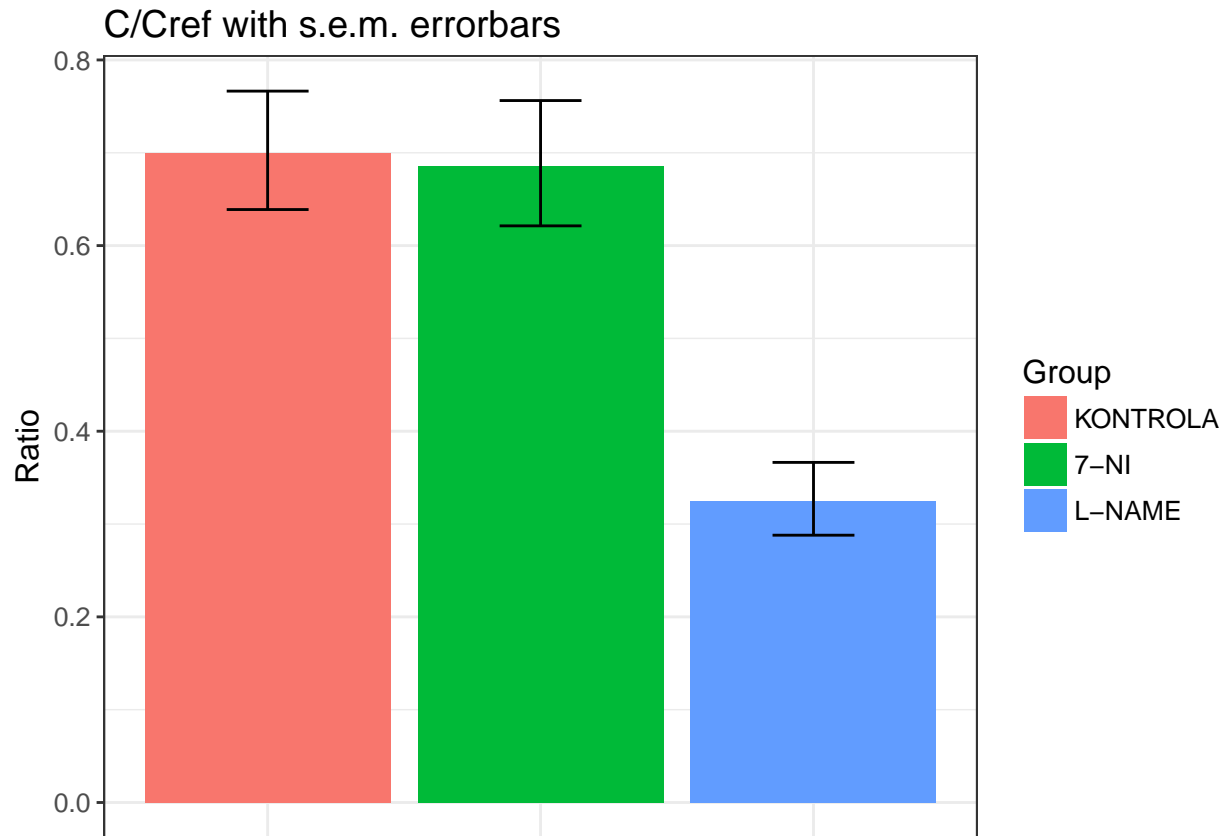

```
## Warning: Removed 2 rows containing non-finite values (stat_boxplot).
```

```
## notch went outside hinges. Try setting notch=FALSE.
```

```
## notch went outside hinges. Try setting notch=FALSE.
```

```
## notch went outside hinges. Try setting notch=FALSE.
```

Log(C/Cref) by Gene and Group

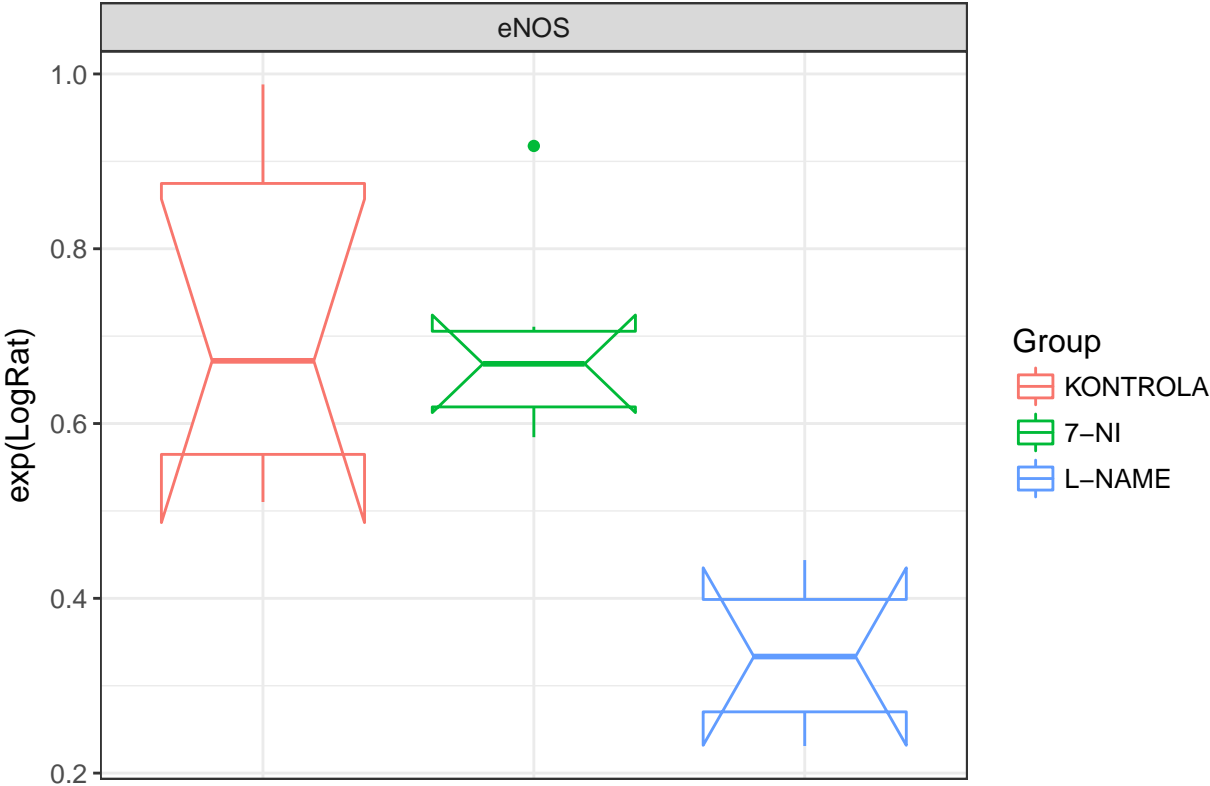

## P-values for contrasts by gene

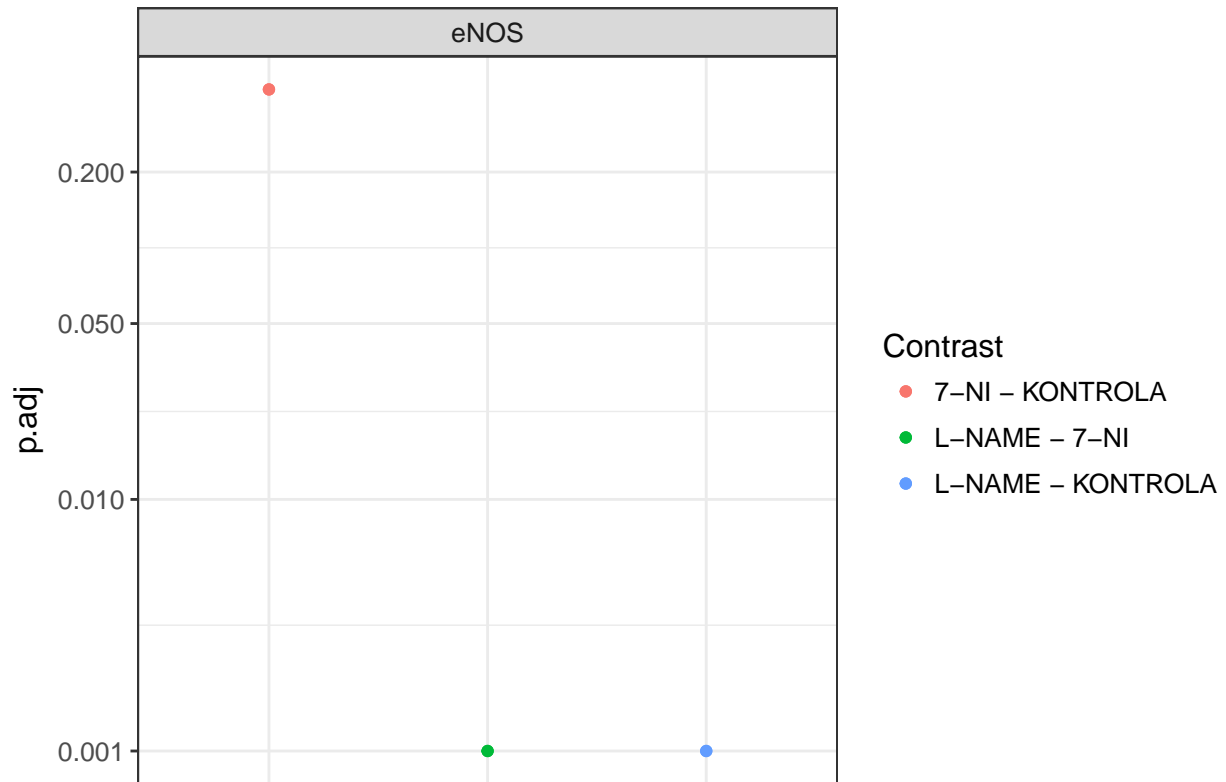

| ##   | Method              | Contrast          | p.adj        | Gene |
|------|---------------------|-------------------|--------------|------|
| ## 1 | Westfall-Young      | 7-NI - KONTROLA   | 4.260000e-01 | eNOS |
| ## 2 | Westfall-Young      | L-NAME - KONTROLA | 1.000000e-03 | eNOS |
| ## 3 | Westfall-Young      | L-NAME - 7-NI     | 1.000000e-03 | eNOS |
| ## 4 | Bonferroni          | 7-NI - KONTROLA   | 9.869885e-01 | eNOS |
| ## 5 | Bonferroni          | L-NAME - KONTROLA | 4.575464e-04 | eNOS |
| ## 6 | Bonferroni          | L-NAME - 7-NI     | 7.769206e-04 | eNOS |
| ## 7 | Benjamini-Yekutieli | 7-NI - KONTROLA   | 8.045387e-01 | eNOS |
| ## 8 | Benjamini-Yekutieli | L-NAME - KONTROLA | 1.022060e-06 | eNOS |
| ## 9 | Benjamini-Yekutieli | L-NAME - 7-NI     | 2.150167e-06 | eNOS |
